# Supplementary material for: 1-Piperidine Propionic Acid as an Allosteric Inhibitor of Protease Activated Receptor-2
Source: MDPI journal article supplement (doi:10.3390/ph16101486), 2023-10-18
Supplement: s1 [file s1]

## Supplementary Figures

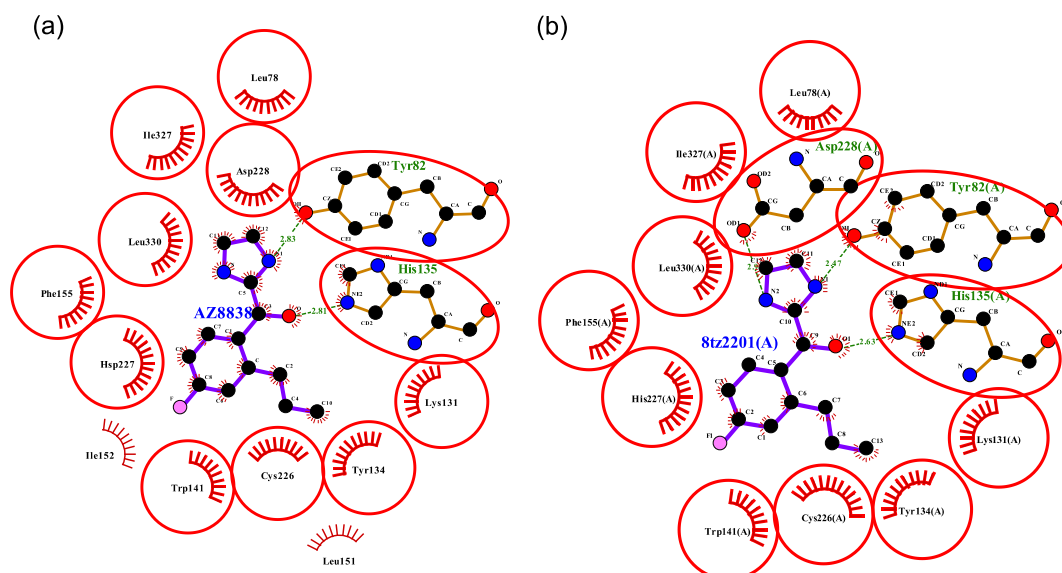

**Figure S2.** LigPlot comparison of PAR2 residues interacting with AZ8838 in 5NDD structure and docking simulation. **(a)** schematic representation of identified interactions between AZ8838 and PAR2 from SwissDock binding mode identification; **(b)** schematic representation of identified interactions between AZ8838 and PAR2 in 5NDD crystallographic structure.
