# Supplementary material for: 1-Piperidine Propionic Acid as an Allosteric Inhibitor of Protease Activated Receptor-2
Source: MDPI journal article supplement (doi:10.3390/ph16101486), 2023-10-18
Supplement: s1 [file s1]

## Supplementary Figures

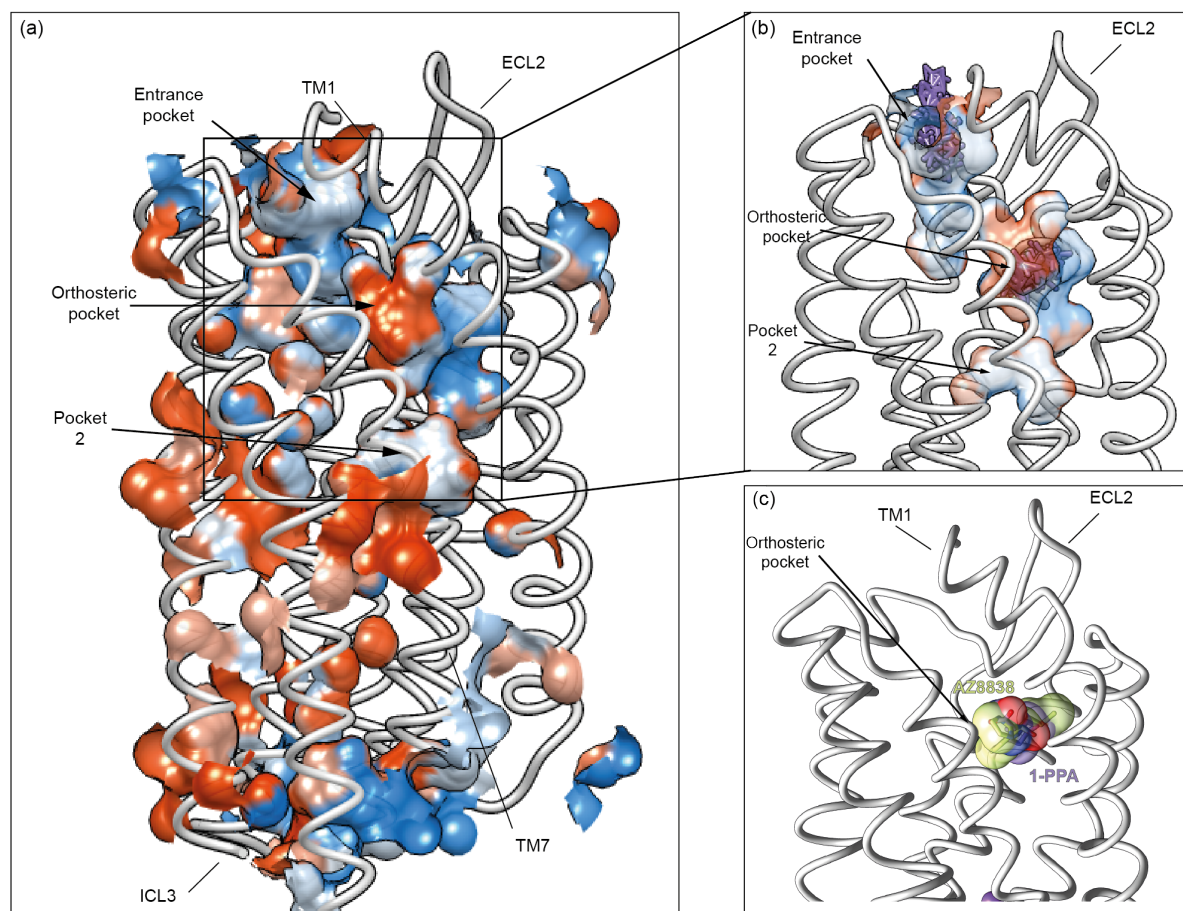

**Figure S1.** Binding pockets and Docking of 1-PPA and AZ8838. (a) *wt*PAR2 model of the transmembrane domain (Val61-Arg362) in white. Surface with charges-based coloring (red: negatively charged regions, blue: positively charged region); (b) Zoom of the biggest pockets showing the overlay of the docking analysis with 1-PPA (in purple); (c) Zoom on the orthosteric pocket showing the overlay of 1-PPA (purple) with AZ8838 (green).
