# Supplementary material for: 1-Piperidine Propionic Acid as an Allosteric Inhibitor of Protease Activated Receptor-2
Source: Pharmaceuticals (Basel). 2023 Oct 18;16(10):1486. doi: 10.3390/ph16101486 (PMC10610151; doi:10.3390/ph16101486)
Supplement: Supplementary file 1 [file pharmaceuticals-16-01486-s001.zip]

Archive with 4 entries (4 files):
- Chinellato_Supplementary Figure S1 Rev2.pdf
- Chinellato_Supplemetary Figure S2 Rev2.pdf
- Chinellato_Supplemetary Figure S3 Rev2.pdf
- Chinellato_Supplemetary Figure S4 Rev2.pdf
